# Supplementary material for: A human iPSC-based neural spheroid platform for modeling glioblastoma infiltration using high-content imaging
Source: Research Square preprint supplement (doi:10.21203/rs.3.rs-7536545/v1), 2025-10-06
Supplement: Supplementary file 1 [file e7693673b42cf9e1454f9930.docx]

A human iPSC-based neural spheroid platform for modeling glioblastoma infiltration using high-content imaging

Victoria S K Tsang1,2*, Federica Riccio1, Hannah Nudds3, Jason Coombes1, Heiko Wurdak4, Harry J C J Bulstrode5,6, Ivo Lieberam1,7 and Davide Danovi1,5,8,9

1Centre for Gene Therapy and Regenerative Medicine, King’s College London, London, United Kingdom

2Translational Medicine and Therapeutics, Queen Mary University of London, London, United Kingdom

3Department of Clinical and Movement Neurosciences, University College London, London, United Kingdom

4School of Medicine, University of Leeds, Leeds, United Kingdom

5Wellcome MRC Cambridge Stem Cell Institute, University of Cambridge, Cambridge, United Kingdom

6Department of Neurosurgery, Addenbrooke's Hospital, Cambridge, United Kingdom

7Centre for Developmental Neurobiology and MRC Centre for Neurodevelopmental Disorders, King’s College London, London, United Kingdom

8Department of Basic and Clinical Neuroscience, King’s College London, London, United Kingdom

9Migration Biotherapeutics, Cardiff, United Kingdom

*lead contact ([v.tsang@qmul.ac.uk](mailto:v.tsang@qmul.ac.uk)).

# Supplementary figures

Figure S1.

1. Normal distribution curves for NS17, GBM20, and GBM1 infiltration calculated from the means and standard deviation at Days 4 and 5 (Z-factor = 0.218240948 and 0.574686702, respectively).
2. Quantification of NS17 infiltration of the neural spheroid at Day 3, normalized to Day 0. Error bars represent mean ± SD. number of independent experiments (n) = 3.


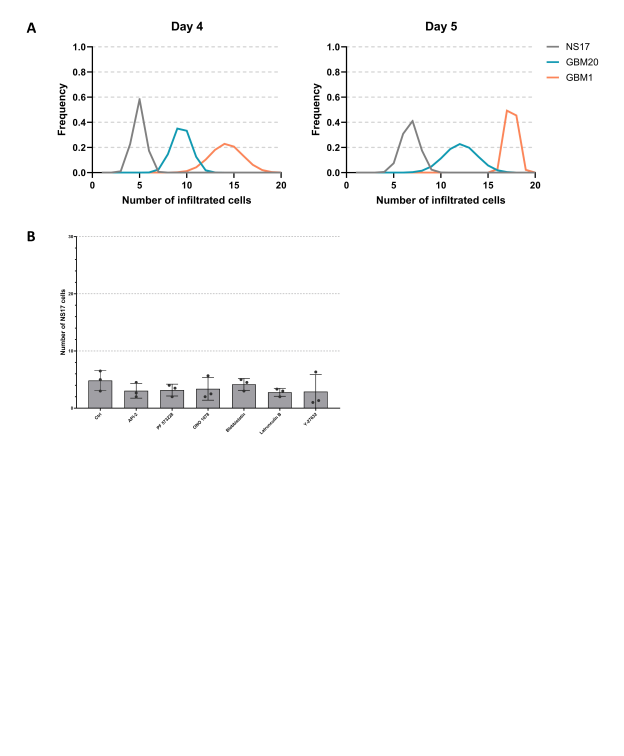


Supplementary videos. Neural spheroids co-cultured with NS17, GBM20, and GBM1 cells imaged for 24h
